# Supplementary material
Source: Research Square preprint supplement (doi:10.21203/rs.3.rs-9017488/v1)
Supplement: Supplementary file 1 [file 12ce489a0851f32f2cd9a716.pdf]

## APPENDIX: QUESTIONNAIRE

**Title:** Exploring the Facilitators and Barriers to Effective Diabetes Self-Management among Type 2 Diabetic Patients at a Teaching Hospital in Ghana

### Section A: Demographic and Socioeconomic Information

1. Age: \_\_\_ years
2. Sex:  Male  Female
3. Marital status:
  - Single
  - Married
  - Divorced/Separated
  - Widowed
4. Educational level:
  - No formal education
  - Primary
  - Junior High School
  - Senior High School
  - Tertiary
5. Occupation: \_\_\_\_\_
6. Monthly income level (GHS):
  - Less than 500
  - 500–999
  - 1,000–1,499
  - 1,500–1,999
  - 2,000 and above
7. Duration since diabetes diagnosis:
  - Less than 1 year
  - 1–5 years
  - More than 5 years
8. Do you have health insurance?  Yes  No

### Section B: Facilitators of Effective Diabetes Self-Management

*Please indicate your level of agreement with the following statements:*

(1 = Strongly Disagree, 2 = Disagree, 3 = Neutral, 4 = Agree, 5 = Strongly Agree)

| No. | Statement                                                                         | 1                        | 2                        | 3                        | 4                        | 5                        |
|-----|-----------------------------------------------------------------------------------|--------------------------|--------------------------|--------------------------|--------------------------|--------------------------|
| 9.  | I have adequate knowledge about managing my diabetes.                             | <input type="checkbox"/> |
| 10. | I receive enough education from healthcare professionals about diet and exercise. | <input type="checkbox"/> |
| 11. | I have access to affordable medications for my condition.                         | <input type="checkbox"/> |
| 12. | My family supports me in following my treatment plan.                             | <input type="checkbox"/> |

| No. | Statement                                                           | 1                        | 2                        | 3                        | 4                        | 5                        |
|-----|---------------------------------------------------------------------|--------------------------|--------------------------|--------------------------|--------------------------|--------------------------|
| 13. | I can easily attend regular follow-up appointments at the hospital. | <input type="checkbox"/> |
| 14. | I have access to blood glucose monitoring equipment at home.        | <input type="checkbox"/> |
| 15. | Support groups or community programs help me manage my diabetes.    | <input type="checkbox"/> |

### Section C: Barriers to Effective Diabetes Self-Management

Please indicate your level of agreement with the following statements:

| No. | Statement                                                                    | 1                        | 2                        | 3                        | 4                        | 5                        |
|-----|------------------------------------------------------------------------------|--------------------------|--------------------------|--------------------------|--------------------------|--------------------------|
| 16. | I sometimes cannot afford to buy my prescribed medications.                  | <input type="checkbox"/> |
| 17. | I find it difficult to follow a healthy diet consistently.                   | <input type="checkbox"/> |
| 18. | I have limited access to healthy food options.                               | <input type="checkbox"/> |
| 19. | Work or family responsibilities prevent me from exercising regularly.        | <input type="checkbox"/> |
| 20. | I face challenges in remembering to take my medications as prescribed.       | <input type="checkbox"/> |
| 21. | Transportation difficulties prevent me from attending hospital appointments. | <input type="checkbox"/> |
| 22. | The cost of diabetes monitoring supplies (e.g., test strips) is too high.    | <input type="checkbox"/> |

### Section D: Open-Ended Questions

1. What has helped you most in managing your diabetes?

---



---

2. What challenges make it difficult for you to manage your diabetes?

---



---

3. What suggestions do you have for improving diabetes care at the Sunyani Teaching Hospital?

---



---
